# Supplementary material for: State alignment with federal regulations in 2022 to relax buprenorphine 30-patient waiver requirements
Source: PubMed Central journal article supplement — Drug Alcohol Depend Rep. 2023 May 2;7:100164. doi: 10.1016/j.dadr.2023.100164 (PMC10206439; doi:10.1016/j.dadr.2023.100164), 2023-05-02
Supplement: mmc2.pdf [file mmc2.pdf]

**Results from Westlaw**  
**Table 1 of Westlaw Regulations and Statutes Among States that are not concordant with new HHS guideline - Training Requirements**

| <u>State</u>                                     | <u>Special circumstances mentioned in regs/statutes</u>                 | <u>Text from the regulation/statute</u>                                                                                                                                                                                                                                                                                                                                                                                                                                                                                                                                                                                                                                                                                                                                                                                                                                                                                                                                                                                                                                                                                                                                                    | <u>Summary of Regulation or Statute</u>                                                                                                                                                                                             | <u>Reg/statute citation (Current date)</u>          | <u>The regs/statutes falls under:</u>                                                                                                                                                                                                                                                                   |
|--------------------------------------------------|-------------------------------------------------------------------------|--------------------------------------------------------------------------------------------------------------------------------------------------------------------------------------------------------------------------------------------------------------------------------------------------------------------------------------------------------------------------------------------------------------------------------------------------------------------------------------------------------------------------------------------------------------------------------------------------------------------------------------------------------------------------------------------------------------------------------------------------------------------------------------------------------------------------------------------------------------------------------------------------------------------------------------------------------------------------------------------------------------------------------------------------------------------------------------------------------------------------------------------------------------------------------------------|-------------------------------------------------------------------------------------------------------------------------------------------------------------------------------------------------------------------------------------|-----------------------------------------------------|---------------------------------------------------------------------------------------------------------------------------------------------------------------------------------------------------------------------------------------------------------------------------------------------------------|
| <b>Physician's Training Requirement</b>          |                                                                         |                                                                                                                                                                                                                                                                                                                                                                                                                                                                                                                                                                                                                                                                                                                                                                                                                                                                                                                                                                                                                                                                                                                                                                                            |                                                                                                                                                                                                                                     |                                                     |                                                                                                                                                                                                                                                                                                         |
| Alabama                                          | OBOT practices                                                          | (a) Physicians who wish to treat opioid addiction with buprenorphine in their medical offices must demonstrate that they have met the requirements of the DATA 2000 legislation and obtained a waiver from SAMHSA [FN2]. ... They also must meet one or more of the following qualifications:<br>1. Subspecialty board certification in addiction psychiatry from the American Board of Medical Specialties; 2. Subspecialty board certification in addiction medicine from the American Osteopathic Association; 3. Addiction certification from the American Board of Addiction Medicine;<br>4. Completion of not less than eight hours of training related to the treatment and management of opioid addiction provided by the American Academy of Addiction Psychiatry, the American Society of Addiction Medicine, the American Medical Association, the American Osteopathic Association, the American Psychiatric Association, or other approved organizations; or 5. Participation as an investigator in one or more clinical trials leading to the approval of an opioid drug in Schedule III, IV, or V or a combination of such drugs for treatment of opioid-addicted patients. | This refers to requirements of a physician who does not hold speciality board certification in addiction medicine or addiction psychiatry, or participate in clinical trials for opioid addiction, practicing in an office setting. | Ala. Admin. Code 540-X-21-02 (12/30/2021)           | AL Administrative Code > AL Board of Medical Examiners > Chapter 540-X-21. Policy on data 2000: Guidelines for treatment of opioid addiction in the medical office                                                                                                                                      |
| Colorado                                         | Treatment of Complex Regional Pain Syndrome under Worker's Compensation | 9. OPIOID ADDICTION TREATMENT: ... Prescribing Suboxone film (buprenorphine/naloxone) for addiction purposes can only be done by a physician and requires special training and certification. Once special training is completed, an application is filed with the DEA to obtain a special DEA license referred to as an X-DEA number.                                                                                                                                                                                                                                                                                                                                                                                                                                                                                                                                                                                                                                                                                                                                                                                                                                                     | This refers to requirements of a physician treating individuals qualifying under Colorado's Workers' Compensation Act as injured workers with Complex Regional Pain Syndrome                                                        | 7 Colo. Code Regs. § 1101-3:17EXHIBIT 7 (2/25/2022) | West's Colorado Admin Code > Title 1100. Dept. of Labor and Employment > 1101. Division of Workers' compensation > Exhibit 7. Complex Regional Pain Syndrome/Reflex Sympathetic Dystrophy medical treatment guideline                                                                                   |
|                                                  | Treatment of Chronic Pain Disorder under Worker's Compensation          | 12. OPIOID ADDICTION TREATMENT: ... Prescribing Suboxone film (buprenorphine/naloxone) for addiction purposes can only be done by a physician and requires special training and certification. Once special training is completed, an application is filed with the DEA to obtain a special DEA license referred to as an X-DEA number.                                                                                                                                                                                                                                                                                                                                                                                                                                                                                                                                                                                                                                                                                                                                                                                                                                                    | This refers to requirements of a physician treating individuals qualifying under Colorado's Workers' Compensation Act as injured workers with Chronic Pain                                                                          | 7 Colo. Code Regs. § 1101-3:17EXHIBIT 9 (2/25/2022) | West's Colorado Admin Code > Title 1100. Dept. of Labor and Employment > 1101. Division of Workers' compensation > Exhibit 9 > Chronic Pain Disorder Medical Treatment Guideline                                                                                                                        |
| Kentucky                                         | All                                                                     | Section 1. Minimum Qualifications for Prescribing, Dispensing, or Administering Buprenorphine-Mono-Product or Buprenorphine-Combined-with-Naloxone. ... (2) The licensee shall successfully complete the approved educational programs required by this subsection. (a) The prescribing licensee shall be a DEA-licensed prescriber of Buprenorphine-Mono-Product or Buprenorphine-Combined-with-Naloxone and shall have obtained Buprenorphine certification through completion of a Substance Abuse and Mental Health Services Administration ("SAMHSA") certified course.                                                                                                                                                                                                                                                                                                                                                                                                                                                                                                                                                                                                               | This refers to requirements of a licensee, which includes physician and physician assistants                                                                                                                                        | 201 Ky. Admin. Regs. 9:270 (3/1/2022)               | KY Admin Reg > Title 201. General Govt. Cabinet > Chapter 9. Board of Medical Licensure                                                                                                                                                                                                                 |
| Louisiana                                        | Treatment of Chronic Pain Disorder under Worker's Compensation          | 12. Opioid Addiction Treatment. ... Prescribing Suboxone film (buprenorphine/naloxone) for addiction purposes can only be done by a physician and requires special training and certification. Once special training is completed, an application is filed with the DEA to obtain a special DEA license referred to as an X-DEA number.                                                                                                                                                                                                                                                                                                                                                                                                                                                                                                                                                                                                                                                                                                                                                                                                                                                    | This refers to the requirements of a physician treating individuals qualifying under Chronic Pain Disorder Medical Treatment Guidelines under the Workers' Compensation Administration                                              | 40 La. Admin. Code Pt I, 2111 (12/20/2021)          | Louisiana Administrative Code > Title 40. Labor and Employment > Part I. Workers' Compensation Administration > Subpart 2. Medical Guidelines > SuperBrowse Chapter 21. Pain Medical Treatment Guidelines > SuperBrowse Subchapter A. Chronic Pain Disorder Medical Treatment Guidelines (Refs & Annos) |
| Maine                                            | OBOTs                                                                   | 1. Clinicians who wish to provide Approved Medications for OUD in an OBOT must: ... C. Obtain a DATA 2000 Waiver and complete buprenorphine training;                                                                                                                                                                                                                                                                                                                                                                                                                                                                                                                                                                                                                                                                                                                                                                                                                                                                                                                                                                                                                                      | This refers to "clinicians" as defined under Chapter 12 as a Maine-licensed physician, physician assistant, or advanced practice registered nurse, who practice in an OBOT                                                          | Code Me. R. tit. 02-383 Ch. 12., § 3 (9/8/2021)     | Code of Maine Rules>Dept. of Professional and Financial Regulation>383 Board of Osteopathic Licensure > Ch. 12. Joint Rule regarding Office based treatment of OUD                                                                                                                                      |
| New Mexico                                       | State Medical Plan/Medicaid                                             | MAD pays for coverage for medication assisted treatment (MAT) for opioid use disorder to an eligible recipient ... A. Eligible providers and practitioners:...(2) Practitioners for diagnosing, assessment, and prescribing include: (a) a physician or DO licensed in the state of New Mexico that has board certification in addiction medicine or addiction psychiatry or has completed special training and has the federal waiver to prescribe buprenorphine;                                                                                                                                                                                                                                                                                                                                                                                                                                                                                                                                                                                                                                                                                                                         | This refers to physician requirements for reimbursement of medication assisted treatment (MAT) provided under New Mexico MAD (Medical Assistance Division)                                                                          | N.M. Admin. Code 8.321.2.27 (11/30/2021)            | Code of NM rules > Title 8.Scoial services > Ch 321. Specialized Behavioral Health Services > Pt.2. Specialized Behavioral Health Provider Enrollment & Reimbursement                                                                                                                                   |
| <b>Nurse Practitioner's Training Requirement</b> |                                                                         |                                                                                                                                                                                                                                                                                                                                                                                                                                                                                                                                                                                                                                                                                                                                                                                                                                                                                                                                                                                                                                                                                                                                                                                            |                                                                                                                                                                                                                                     |                                                     |                                                                                                                                                                                                                                                                                                         |

|            |                             |                                                                                                                                                                                                                                                                                                                                                                                                                                                                            |                                                                                                                                                                                                                                                                                                                                                                                                                                                                                                                                                                                                                            |                                                         |                                                                                                                                                                       |
|------------|-----------------------------|----------------------------------------------------------------------------------------------------------------------------------------------------------------------------------------------------------------------------------------------------------------------------------------------------------------------------------------------------------------------------------------------------------------------------------------------------------------------------|----------------------------------------------------------------------------------------------------------------------------------------------------------------------------------------------------------------------------------------------------------------------------------------------------------------------------------------------------------------------------------------------------------------------------------------------------------------------------------------------------------------------------------------------------------------------------------------------------------------------------|---------------------------------------------------------|-----------------------------------------------------------------------------------------------------------------------------------------------------------------------|
| California | All                         | (a) The requirement that the nurse practitioner complete not fewer than 24 hours of initial training provided by an organization listed in sub-subclause (aa) of subclause (II) of clause (iv) of subparagraph (G) of paragraph (2) of subdivision (g) of Section 823 of Title 21 of the United States Code, or any other organization that the United States Secretary of Health and Human Services determines is appropriate for the purposes of that sub-subclause, ... | This refers to requirements of a nurse practitioner for education provided by the organizations in the referenced Title 21 of the United States Code which includes the American Society of Addiction Medicine, the American Academy of Addiction Psychiatry, the American Medical Association, the American Osteopathic Association, the American Nurses Credentialing Center, the American Psychiatric Association, the American Association of Nurse Practitioners, the American Academy of Physician Assistants, or any other organization that the Secretary determines is appropriate for purposes of this subclause | Cal. Bus. & Prof. Code § 2836.4 (West) (2022 Reg. Sess) | West's Annotated CA Codes>Business and Professions Code > Div.2. Healing Arts>Ch.6. Nursing > Article 1. Nurse Practitioners                                          |
| Kentucky   | All                         | Section 2. Minimum Qualifications for Prescribing Buprenorphine. An advanced practice registered nurse (APRN) shall not prescribe Buprenorphine for Opioid Use Disorder unless that APRN possesses the minimum qualifications established in this section. (2) The APRN shall: ... (b) Have obtained medication assisted treatment education through completion of a Substance Abuse and Mental Health Services Administration (SAMHSA) sponsored course.                  | This refers to requirements of an advanced practice registered nurse                                                                                                                                                                                                                                                                                                                                                                                                                                                                                                                                                       | 201 Ky. Admin. Regs. 20:065 (3/1/2022)                  | KY Admin Reg > Title 201. General Govt. cabinet > Chapter 20. Board of Nursing                                                                                        |
| Maine      | OBOT practices              | 1. Clinicians who wish to provide Approved Medications for OUD in an OBOT must: ... C. Obtain a DATA 2000 Waiver and complete buprenorphine training;                                                                                                                                                                                                                                                                                                                      | This refers to "clinicians" as defined under Chapter 12 as a Maine-licensed physician, physician assistant, or advanced practice registered nurse, who practice in an OBOT                                                                                                                                                                                                                                                                                                                                                                                                                                                 | Code Me. R. tit. 02-383 Ch. 12, § 3 (9/8/2021)          | Code of Maine Rules>Dept. of Professional and Financial Regulation>383 Board of Osteopathic Licensure > Ch. 12. Joint Rule regarding Office based treatment of OUD    |
| New Mexico | State Medical Plan/Medicaid | MAD pays for coverage for medication assisted treatment (MAT) for opioid use disorder to an eligible recipient ... A. Eligible providers and practitioners:... (2) Practitioners for diagnosing, assessment, and prescribing include: (b) a certified nurse practitioner that has completed 24 hours of required training and has a DATA 2000 waiver; or                                                                                                                   | This refers to provider and practitioner requirements for reimbursement of medication assisted treatment (MAT) provided under New Mexico MAD (Medical Assistance Division)                                                                                                                                                                                                                                                                                                                                                                                                                                                 | N.M. Admin. Code 8.321.2.27 (11/30/2021)                | Code of NM rules > Title 8.Scoial services > Ch 321. Specialized Behavioral Health Services > Pt.2. Specialized Behavioral Health Provider Enrollment & Reimbursement |

**Physician Assistant's Training Requirement**

|            |                |                                                                                                                                                                                                                                                                                                                                                                                                                                                                                                                                                                              |                                                                                                                                                                                                                                                                                                                                                                                                                                                                                                                                                                                                                             |                                                           |                                                                                                                                                                    |
|------------|----------------|------------------------------------------------------------------------------------------------------------------------------------------------------------------------------------------------------------------------------------------------------------------------------------------------------------------------------------------------------------------------------------------------------------------------------------------------------------------------------------------------------------------------------------------------------------------------------|-----------------------------------------------------------------------------------------------------------------------------------------------------------------------------------------------------------------------------------------------------------------------------------------------------------------------------------------------------------------------------------------------------------------------------------------------------------------------------------------------------------------------------------------------------------------------------------------------------------------------------|-----------------------------------------------------------|--------------------------------------------------------------------------------------------------------------------------------------------------------------------|
| California | All            | (a) The requirement that the physician assistant complete not fewer than 24 hours of initial training provided by an organization listed in sub-subclause (aa) of subclause (II) of clause (iv) of subparagraph (G) of paragraph (2) of subdivision (g) of Section 823 of Title 21 of the United States Code, or any other organization that the United States Secretary of Health and Human Services determines is appropriate for the purposes of that sub-subclause,                                                                                                      | This refers to requirements of a physician assistant for education provided by the organizations in the referenced Title 21 of the United States Code which includes the American Society of Addiction Medicine, the American Academy of Addiction Psychiatry, the American Medical Association, the American Osteopathic Association, the American Nurses Credentialing Center, the American Psychiatric Association, the American Association of Nurse Practitioners, the American Academy of Physician Assistants, or any other organization that the Secretary determines is appropriate for purposes of this subclause | Cal. Bus. & Prof. Code § 3502.1.5 (West) (2022 Reg. Sess) | West's Annotated CA Codes>Business and Professions Code > Div.2. Healing Arts>Ch.7.7. Physician Assistants > Article 1. General Provisions                         |
| Kentucky   | All            | Section 1. Minimum Qualifications for Prescribing, Dispensing, or Administering Buprenorphine-Mono-Product or Buprenorphine-Combined-with-Naloxone. ... (2) The licensee shall successfully complete the approved educational programs required by this subsection. (a) The prescribing licensee shall be a DEA-licensed prescriber of Buprenorphine-Mono-Product or Buprenorphine-Combined-with-Naloxone and shall have obtained Buprenorphine certification through completion of a Substance Abuse and Mental Health Services Administration ("SAMHSA") certified course. | This refers to requirements of a licensee which includes physician and physician assistants                                                                                                                                                                                                                                                                                                                                                                                                                                                                                                                                 | 201 Ky. Admin. Regs. 9:270 (3/1/2022)                     | KY Admin Reg > Title 201. General Govt. Cabinet > Chapter 9. Board of Medical Licensure                                                                            |
| Maine      | OBOT practices | 1. Clinicians who wish to provide Approved Medications for OUD in an OBOT must: ... C. Obtain a DATA 2000 Waiver and complete buprenorphine training;                                                                                                                                                                                                                                                                                                                                                                                                                        | This refers to "clinicians" as defined under Chapter 12 as a Maine-licensed physician, physician assistant, or advanced practice registered nurse, who practice in an OBOT                                                                                                                                                                                                                                                                                                                                                                                                                                                  | Code Me. R. tit. 02-383 Ch. 12, § 3 (9/8/2021)            | Code of Maine Rules>Dept. of Professional and Financial Regulation>383 Board of Osteopathic Licensure > Ch. 12. Joint Rule regarding Office based treatment of OUD |

**Table 2 of Westlaw Regulations and Statutes Among States that are not concordant with new HHS guideline - Ancillary Service Requirements**

| State | Population/Setting | Reg/statute citation |
|-------|--------------------|----------------------|
|-------|--------------------|----------------------|

**States in which practitioner type was not specified**

|               |                                                                                                    |                                                                                                                                                                                                                                                                                                                                                                                                                                                                                                                                                                                                                                                                                                                                                                                                                                                                                                                             |                                                                                                                                                                                   |                                                            |                                                                                                                                                                                                                |
|---------------|----------------------------------------------------------------------------------------------------|-----------------------------------------------------------------------------------------------------------------------------------------------------------------------------------------------------------------------------------------------------------------------------------------------------------------------------------------------------------------------------------------------------------------------------------------------------------------------------------------------------------------------------------------------------------------------------------------------------------------------------------------------------------------------------------------------------------------------------------------------------------------------------------------------------------------------------------------------------------------------------------------------------------------------------|-----------------------------------------------------------------------------------------------------------------------------------------------------------------------------------|------------------------------------------------------------|----------------------------------------------------------------------------------------------------------------------------------------------------------------------------------------------------------------|
| Arkansas      | State Medical Plan/Medicaid                                                                        | ... D. In accordance with SAMHSA guidelines, MAT requires at a minimum: a. Initial evaluation and diagnosis of Opioid Use Disorder, including: ... vi. Referral for independent clinical counseling or documented plan for integrated follow-up visit including counseling.                                                                                                                                                                                                                                                                                                                                                                                                                                                                                                                                                                                                                                                 | This refers to the requirements of physicians for coverage of Medication-Assisted Treatment (MAT) for eligible beneficiaries with OUD.                                            | Code Ark. R. 016.06.36-230.000 (11/15/2021)                | West's AR Admin Code > Title 016. Dept. of Human Services> Div 06. Division of Medical Services>Rule 36.Physician/Independent Lab/Crma/Radiation Therapy Center Provider Manual > Sec. 230. MAT                |
| Indiana       | OBOT practices                                                                                     | Sec. 2. ... (c) A health care provider that prescribes for a patient in an office based opioid treatment setting shall do and document the following: ... (12) Provide for an ongoing component of psychosocial supportive therapy, with direction from the health care provider on the amount of the therapy.                                                                                                                                                                                                                                                                                                                                                                                                                                                                                                                                                                                                              | This refers to the requirements for healthcare providers in OBOT settings.                                                                                                        | Ind. Code Ann. § 12-23-20-2 (West) (7/1/2021)              | West's Annotated IN Code > Title 12. Human Services > Article 23. Addiction Services > Ch. 20 OTP                                                                                                              |
| Maine         | Receiving or Providing care with buprenorphine products for Substance Use Disorder under MaineCare | 80.07-13 Buprenorphine and Buprenorphine Combination Products for Substance Use Disorder (SUD) ... B. Prescriber Requirements ... 4. Prescribers must conduct a comprehensive screening and assessment of the member including a complete history; physical examination; mental status examination; relevant laboratory testing; and a formal psychiatric assessment (if indicated). The initial assessment must address the following elements in the preparation and development of treatment planning goals: Educational needs; Vocational rehabilitation needs; Employment needs; Medical support services; Psychosocial support services; Economic support services; Legal support services; Other special needs and/or services. ... 9. Prescribers must coordinate and refer members to psychosocial counseling and document member's record with progress notes as to member's adherence with counseling treatment. | This refers to the prescriber requirements for coverage of buprenorphine and buprenorphine products under MaineCare Pharmacy Services.                                            | Code Me. R. tit. 10-144 Ch. 101, Ch. II., § 80 (7/16/2021) | Code of Main Rules>10. Dept of Health and Human Services > 144. Dept. of Health and Human Services - General > Ch. 101. Mainecare Benefits Manual > Ch. II. Specific Policies by service.                      |
| New Mexico    | State Medical Plan/Medicaid                                                                        | MAD pays for coverage for medication assisted treatment (MAT) for opioid use disorder to an eligible recipient ... B. Coverage criteria: (1) an assessment and diagnosis by the prescribing practitioner as to whether the recipient has an opioid abuse diagnosis and their readiness for change must be conducted prior to starting treatment; (2) an assessment for concurrent medical or behavioral health illnesses; (3) an assessment for co-occurring substance abuse disorders; (4) educating the recipient as to differing treatment options prior to starting treatment; and (5) a service plan that prescribes either in house counseling or therapy, or referral to outside services, as indicated.                                                                                                                                                                                                             | This refers to practitioner requirements for enrollment and reimbursement of medication-assisted treatment (MAT) for eligible recipients under MAD (Medical Assistance Division). | N.M. Admin. Code 8.321.2.27 (12/14/2021)                   | Code of NM rules > Title 8.Scoial services > Ch 321. Specialized Behavioral Health Services > Pt.2. Specialized Behavioral Health Provider Enrollment & Reimbursement                                          |
| Vermont       | All                                                                                                | 6.2.2 Psychosocial Assessment and Referral to Services<br>6.2.2.1 The psychosocial assessment shall be completed before the fourth patient visit to the provider prescribing or dispensing MAT. The psychosocial assessment must be completed by a provider who is a licensed Psychiatrist, a physician certified by the American Board of Addiction Medicine, a Psychiatric Nurse Practitioner, a Psychiatric Physician Assistant, a licensed mental health/addictions clinician such as a Licensed or Certified Social Worker, a Psychologist, a Licensed Mental Health Counselor, a Licensed Marriage and Family Therapist or a Licensed Alcohol and Drug Abuse Counselor. If the prescribing provider is not certified in one of these disciplines then the patient shall be referred for the psychosocial assessment.                                                                                                  | This refers to the requirement of the provider to prescribe Medication-Assisted Treatment (MAT).                                                                                  | 12-5 Vt. Code R. § 102 (February 2022)                     | VT Admin Code>Title 12. Agency of Human Services > Subtitle 5. Dept. of Health>Div. of Alcohol and Drug Abuse Programs>Rule 102. Rules Governing MAT for OUD for a. OBOT providers; 2. OTP - state regulations |
| West Virginia | OBOT practices                                                                                     | (k) A person, partnership, association, or corporation providing office-based, medication-assisted treatment to no more than 30 patients of their practice or program is exempt from the registration requirement contained in § 16-5Y-4(a) of this code: Provided, That it: (1) Attests to the Office of Health Facility Licensure and Certification on a form prescribed by the secretary that the person, partnership, association, or corporation requires counselling and drug screens, has implemented diversion control measures, has completed medical education training on addiction treatment encompassing all forms of medication-assisted treatment, will provide patient numbers upon request, and will provide any other information required by the secretary related to patient health and safety; ...                                                                                                     | This refers to the requirements of a person, partnership, association, or corporation operating in OBOT settings for less than 30 patients.                                       | W. Va. Code Ann. § 16-5Y-4 (West) (February 2022)          | West's Annotated Code of WV > Ch.16 Public Health > Article 5y. MAT Program Licensing Act                                                                                                                      |

**Physician's Ancillary Requirement**

|         |                |                                                                                                                                                                                                                                                                                                                                                                                                     |                                                                                                                                                                                        |                                                 |                                                                                                                                                                          |
|---------|----------------|-----------------------------------------------------------------------------------------------------------------------------------------------------------------------------------------------------------------------------------------------------------------------------------------------------------------------------------------------------------------------------------------------------|----------------------------------------------------------------------------------------------------------------------------------------------------------------------------------------|-------------------------------------------------|--------------------------------------------------------------------------------------------------------------------------------------------------------------------------|
| Alabama | OBOT practices | (2) Physician Qualifications. ... (d) DATA 2000 also requires that a physician who wishes to treat opioid addiction with buprenorphine in an office setting must demonstrate a capacity to offer (or refer patients for) appropriate counseling and other ancillary services, and to recognize when those services are needed.                                                                      | This refers to the qualifications of a physician to prescribe buprenorphine in an office-based setting.                                                                                | Ala. Admin. Code 540-X-21-.03 (7/30/2021)       | AL Admic Code > AL Board of Medical Examiners > Ch. 540-X-21. Policy on Data 2000: Guidelines for the Treatment of Opioid Addiction in the Medical Office                |
| Maine   | OBOT practices | B. Evaluation of the Patient's Health Status ... 2. Psychosocial Assessment and Referral to Services<br>a. OBOT clinicians shall conduct a psychosocial assessment, or shall refer the patient for such an assessment to another clinician qualified by education, training or experience, or to a licensed mental health provider, before or as soon as possible after the initiation of the OBOT. | This refers to the requirements of clinicians, defined in Chapter 12 as "Maine-licensed physicians, physician assistants, or advanced practice registered nurses," in an OBOT setting. | Code Me. R. tit. 02-373 Ch. 12, § 5 (7/16/2021) | Code of Maine Rules>02. Dept. of Professional and financial Regulation > 373. Board of Licensure in Medicine > Ch.12. Joint Rule Regarding Office Based treatment of OUD |

|            |                                             |                                                                                                                                                                                                                                                                                                                                                                                                                                                                                                                                                                                                                                                                                                                                                                 |                                                                                                                                                                                                                                   |                                                                                          |                                                                                                                                                                                                                                                                                                                                                                                                                                                                                                        |
|------------|---------------------------------------------|-----------------------------------------------------------------------------------------------------------------------------------------------------------------------------------------------------------------------------------------------------------------------------------------------------------------------------------------------------------------------------------------------------------------------------------------------------------------------------------------------------------------------------------------------------------------------------------------------------------------------------------------------------------------------------------------------------------------------------------------------------------------|-----------------------------------------------------------------------------------------------------------------------------------------------------------------------------------------------------------------------------------|------------------------------------------------------------------------------------------|--------------------------------------------------------------------------------------------------------------------------------------------------------------------------------------------------------------------------------------------------------------------------------------------------------------------------------------------------------------------------------------------------------------------------------------------------------------------------------------------------------|
|            | OBOT practices                              | B. Evaluation of the Patient's Health Status ... 2. Psychosocial Assessment and Referral to Services<br>a. OBOT clinicians shall conduct a psychosocial assessment, or shall refer the patient for such an assessment to another clinician qualified by education,                                                                                                                                                                                                                                                                                                                                                                                                                                                                                              | This refers to the requirements of clinicians, defined in Chapter 12 as "Maine-licensed physicians, physician assistants, or advanced practice registered nurses," in an OBOT setting.                                            | Code Me. R. tit. 02-383 Ch. 12., § 5 (10/8/2021)                                         | Code of Maine Rules>02. Dept. of Professional and Financial Regulation> 383. Board of Osteopathic Licensure> Ch 12. Joint rule regarding office based treatment of OUD                                                                                                                                                                                                                                                                                                                                 |
| New Jersey | Substance Use Disorder treatment facilities | II. Services To Be Provided Post Detoxification ... All patients accepted into buprenorphine therapy must be referred to an OOL licensed substance use disorders treatment facility or individual therapists who are certified and/or licensed to provide substance abuse counseling.                                                                                                                                                                                                                                                                                                                                                                                                                                                                           | This refers to the requirements of physicians' guidelines for the use of buprenorphine in outpatient substance use disorder treatment facilities.                                                                                 | N.J. Admin. Code § 10:161B App. B (11/15/2021)                                           | NJ Admin Code>Title 10. Human Services> Ch.161B. Standards for Licensure of Outpatient substance use disorder treatment facilities                                                                                                                                                                                                                                                                                                                                                                     |
| Ohio       | OBOT practices                              | (C) The physician who provides OBOT shall establish and document a treatment plan that includes all of the following: ... (6) A plan for psychosocial treatment, pursuant to paragraph (E) of this rule. ... (E) Except if the physician providing OBOT is a board certified addictionologist, board certified addiction psychiatrist, or psychiatrist, the physician shall refer and work jointly with a qualified behavioral healthcare provider, community mental health services provider, or community addiction services provider, as those terms are defined in rule 4731-33-01 of the Administrative Code, to determine the optimal type and intensity of psychosocial treatment for the patient and document the treatment plan in the patient record. | This refers to the requirements of a physician who provides Medication-Assisted Treatment (MAT) in OBOT settings.                                                                                                                 | Ohio Admin. Code 4731-33-03 (1/21/2022)                                                  | Baldwin's OH Admin Code Annotated > 4731 Medical Board > Ch. 4731-33. MAT                                                                                                                                                                                                                                                                                                                                                                                                                              |
| Virginia   | All                                         | D. Practitioners engaged in medication-assisted treatment shall either provide counseling in their practice or refer the patient to a mental health service provider, as defined in § 54.1-2400.1 of the Code of Virginia, who has the education and experience to provide substance misuse counseling. The practitioner shall document provision of counseling or referral in the medical record.<br><br>J. The practitioner shall incorporate relapse prevention strategies into counseling or assure that they are addressed by a mental health service provider, as defined in § 54.1-2400.1 of the Code of Virginia, who has the education and experience to provide substance misuse counseling.                                                          | This refers to the requirements of a practitioner engaged in office-based settings and is listed under the Board of Medicine.<br><br>This refers to the requirements of a practitioner and is listed under the Board of Medicine. | 18 Va. Admin. Code 85-21-130 (14/2/2022)<br><br>18 Va. Admin. Code 85-21-150 (14/2/2022) | VA Admin Code > Title 18. Professional and Occupational Licensing > Vac Agency No. 85. Board of Medicine > Ch 21. Regulations Governing Prescribing of Opioids and Buprenorphine > Pt. IV. Prescribing of Buprenorphine for Addiction treatment<br><br>VA Admin Code > Title 18. Professional and Occupational Licensing > Vac Agency No. 85. Board of Medicine > Ch 21. Regulations Governing Prescribing of Opioids and Buprenorphine > Pt. IV. Prescribing of Buprenorphine for Addiction treatment |

**Nurse Practitioner's Ancillary Requirement**

|       |                |                                                                                                                                                                                                                                                                                                                                                                                                                                                                                                                                                                                                                                                                                                                                                                                                                                                                                                                                                                                                                                                                                                                                                                                                                                                                                                                                                                                                          |                                                                                                                                                                                        |                                                  |                                                                                                                                                                          |
|-------|----------------|----------------------------------------------------------------------------------------------------------------------------------------------------------------------------------------------------------------------------------------------------------------------------------------------------------------------------------------------------------------------------------------------------------------------------------------------------------------------------------------------------------------------------------------------------------------------------------------------------------------------------------------------------------------------------------------------------------------------------------------------------------------------------------------------------------------------------------------------------------------------------------------------------------------------------------------------------------------------------------------------------------------------------------------------------------------------------------------------------------------------------------------------------------------------------------------------------------------------------------------------------------------------------------------------------------------------------------------------------------------------------------------------------------|----------------------------------------------------------------------------------------------------------------------------------------------------------------------------------------|--------------------------------------------------|--------------------------------------------------------------------------------------------------------------------------------------------------------------------------|
| Maine | OBOT practices | B. Evaluation of the Patient's Health Status ... 2. Psychosocial Assessment and Referral to Services<br>a. OBOT clinicians shall conduct a psychosocial assessment, or shall refer the patient for such an assessment to another clinician qualified by education, training or experience, or to a licensed mental health provider, before or as soon as possible after the initiation of the OBOT.                                                                                                                                                                                                                                                                                                                                                                                                                                                                                                                                                                                                                                                                                                                                                                                                                                                                                                                                                                                                      | This refers to the requirements of clinicians, defined in Chapter 12 as "Maine-licensed physicians, physician assistants, or advanced practice registered nurses," in an OBOT setting. | Code Me. R. tit. 02-373 Ch. 12., § 5 (7/16/2021) | Code of Maine Rules>02. Dept. of Professional and financial Regulation > 373. Board of Licensure in Medicine > Ch.12. Joint Rule Regarding Office Based treatment of OUD |
|       | OBOT practices | B. Evaluation of the Patient's Health Status ... 2. Psychosocial Assessment and Referral to Services<br>a. OBOT clinicians shall conduct a psychosocial assessment, or shall refer the patient for such an assessment to another clinician qualified by education, training or experience, or to a licensed mental health provider, before or as soon as possible after the initiation of the OBOT.                                                                                                                                                                                                                                                                                                                                                                                                                                                                                                                                                                                                                                                                                                                                                                                                                                                                                                                                                                                                      | This refers to the requirements of clinicians, defined in Chapter 12 as "Maine-licensed physicians, physician assistants, or advanced practice registered nurses," in an OBOT setting. | Code Me. R. tit. 02-383 Ch. 12., § 5 (10/8/2021) | Code of Maine Rules>02. Dept. of Professional and Financial Regulation> 383. Board of Osteopathic Licensure> Ch 12. Joint rule regarding office based treatment of OUD   |
|       | OBOT practices | B. Evaluation of the Patient's Health Status ... 2. Psychosocial Assessment and Referral to Services<br>a. OBOT clinicians shall conduct a psychosocial assessment, or shall refer the patient for such an assessment to another clinician qualified by education, training or experience, or to a licensed mental health provider, before or as soon as possible after the initiation of the OBOT.                                                                                                                                                                                                                                                                                                                                                                                                                                                                                                                                                                                                                                                                                                                                                                                                                                                                                                                                                                                                      | This refers to the requirements of clinicians, defined in Chapter 12 as "Maine-licensed physicians, physician assistants, or advanced practice registered nurses," in an OBOT setting. | Code Me. R. tit. 02-380 Ch. 12., § 5 (10/8/2021) | Code of Main Rules> 02. Dept of Professional and Financial Regulation > 380. State Board of Nursing > Ch. 12 Joint Rule regarding office based treatment of OUD          |
| Ohio  | OBOT practices | (C) In addition to the requirements for medication-assisted treatment set forth in paragraph (B) of this rule, an advanced practice registered nurse with a current valid license issued by the board and designated as a clinical nurse specialist or certified nurse practitioner may provide OBOT under the following circumstances: (5) Except if the advanced practice registered nurse is a qualified behavior healthcare provider, the advanced practice registered nurse shall refer and work jointly with a qualified behavioral healthcare provider, community mental health services provider, or community addiction services provider to determine the optimal type and intensity of psychosocial treatment for the patient and document the treatment plan in the patient record.<br>(a) The treatment shall at minimum include a psychosocial needs assessment, supportive counseling, links to existing family supports, and referral to community services; ... (9) If the advanced practice registered nurse provides OBOT using buprenorphine products, the following additional requirements must be met: ... (h) The advanced practice registered nurse shall incorporate relapse prevention strategies into counseling or assure that they are addressed by a qualified behavioral healthcare provider who has the education and experience to provide substance abuse counseling. | This refers to the requirement of advanced practice registered nurse when providing buprenorphine in an OBOT setting                                                                   | Ohio Admin. Code 4723-9-13 (8/31/2021)           | Baldwin's OH Admin Code Annotated > 4723 Nursing Board > Ch. 4723-9. Prescribing Authority                                                                               |

**Physician Assistant's Ancillary Requirement**

|       |                |                                                                                                                                                                                                                                                                                                                                                                                                                                                                                                                                                                                                                                                                                                                                                                                                                                                                                                                                                                                                                                                                                                                                                                                                                                                                                                                                            |                                                                                                                                                                                        |                                                  |                                                                                                                                                                          |
|-------|----------------|--------------------------------------------------------------------------------------------------------------------------------------------------------------------------------------------------------------------------------------------------------------------------------------------------------------------------------------------------------------------------------------------------------------------------------------------------------------------------------------------------------------------------------------------------------------------------------------------------------------------------------------------------------------------------------------------------------------------------------------------------------------------------------------------------------------------------------------------------------------------------------------------------------------------------------------------------------------------------------------------------------------------------------------------------------------------------------------------------------------------------------------------------------------------------------------------------------------------------------------------------------------------------------------------------------------------------------------------|----------------------------------------------------------------------------------------------------------------------------------------------------------------------------------------|--------------------------------------------------|--------------------------------------------------------------------------------------------------------------------------------------------------------------------------|
| Maine | OBOT practices | B. Evaluation of the Patient's Health Status ... 2. Psychosocial Assessment and Referral to Services<br>a. OBOT clinicians shall conduct a psychosocial assessment, or shall refer the patient for such an assessment to another clinician qualified by education, training or experience, or to a licensed mental health provider, before or as soon as possible after the initiation of the OBOT.                                                                                                                                                                                                                                                                                                                                                                                                                                                                                                                                                                                                                                                                                                                                                                                                                                                                                                                                        | This refers to the requirements of clinicians, defined in Chapter 12 as "Maine-licensed physicians, physician assistants, or advanced practice registered nurses," in an OBOT setting. | Code Me. R. tit. 02-373 Ch. 12, § 5 (7/16/2021)  | Code of Maine Rules>02. Dept. of Professional and Financial Regulation > 373. Board of Licensure in Medicine > Ch.12. Joint Rule Regarding Office Based treatment of OUD |
|       | OBOT practices | B. Evaluation of the Patient's Health Status ... 2. Psychosocial Assessment and Referral to Services<br>a. OBOT clinicians shall conduct a psychosocial assessment, or shall refer the patient for such an assessment to another clinician qualified by education, training or experience, or to a licensed mental health provider, before or as soon as possible after the initiation of the OBOT.                                                                                                                                                                                                                                                                                                                                                                                                                                                                                                                                                                                                                                                                                                                                                                                                                                                                                                                                        | This refers to the requirements of clinicians, defined in Chapter 12 as "Maine-licensed physicians, physician assistants, or advanced practice registered nurses," in an OBOT setting. | Code Me. R. tit. 02-383 Ch. 12., § 5 (10/8/2021) | Code of Maine Rules>02. Dept. of Professional and Financial Regulation> 383. Board of Osteopathic Licensure> Ch 12. Joint rule regarding office based treatment of OUD   |
| Ohio  | OBOT practices | (C) The physician assistant who provides OBOT shall establish and document a treatment plan that includes all of the following: ... (6) A plan for psychosocial treatment, pursuant to paragraph (E) of this rule. ... (E) The physician assistant shall refer and work jointly with a qualified behavioral healthcare provider, community mental health services provider, or community addiction services provider, as those terms are defined in rule 4730-4-01 of the Administrative Code, to determine the optimal type and intensity of psychosocial treatment for the patient and document the treatment plan in the patient record. (1) The treatment shall, at a minimum, include a psychosocial needs assessment, supportive counseling, links to existing family supports, and referral to community services. ... (G) In addition to paragraphs (A) to (F) of this rule, the physician assistant who provides OBOT using buprenorphine products shall comply with all of the following requirements: ... (8) The physician assistant shall incorporate relapse prevention strategies into the counseling or assure that they are addressed by a qualified behavioral healthcare provider, as defined in rule 4730-4-01 of the Administrative Code, who has the education and experience to provide substance abuse counseling. | This refers to the requirement of a physician assistant who provides buprenorphine in an OBOT setting.                                                                                 | Ohio Admin. Code 4730-4-03 (1/21/2022)           | Baldwin's Ohio Admin Code Annotated>4730 PA Licensing > Ch 4730-4 MAT                                                                                                    |
